# Supplementary material for: Improving risk estimates for metabolically healthy obesity and mortality using a refined healthy reference group
Source: PubMed Central journal article supplement (PMC5967883; doi:10.1530/eje-17-0217), 2017-05-30
Supplement: eje-177-169-t001.pdf [file eje-177-169-t001.pdf]

## Supplementary analyses

**Table S1.** Cox proportional hazards regression for associations of obesity, metabolic health and mortality, with referent healthy non-obese group defined by status in 2004-05 only (n=5,427). Models additionally adjusted for medication.

| <b>Baseline metabolic health/obesity status</b> | <b>All Deaths / N</b> | <b>Model 1 HR (95% CI)</b> | <b>Model 2 HR (95% CI)</b> |
|-------------------------------------------------|-----------------------|----------------------------|----------------------------|
| Healthy non-obese                               | 262/2503              | 1.00 (ref)                 | 1.00 (ref)                 |
| Unhealthy non-obese                             | 215/1364              | 1.35 (1.12, 1.61)          | 1.31 (1.08, 1.58)          |
| Healthy obese                                   | 52/514                | 1.20 (0.89, 1.62)          | 1.17 (0.86, 1.58)          |
| Unhealthy obese                                 | 142/1046              | 1.51 (1.23, 1.86)          | 1.38 (1.11, 1.71)          |
|                                                 |                       |                            |                            |
|                                                 | <b>CVD deaths/N</b>   |                            |                            |
| Healthy non-obese                               | 62/2503               | 1.00 (ref)                 | 1.00 (ref)                 |
| Unhealthy non-obese                             | 54/1364               | 1.43 (1.00, 2.06)          | 1.40 (0.95, 2.06)          |
| Healthy obese                                   | 9/514                 | 0.98 (0.49, 1.97)          | 0.95 (0.47, 1.93)          |
| Unhealthy obese                                 | 38/1046               | 1.91 (1.27, 2.88)          | 1.68 (1.09, 2.59)          |

Model 1 adjusted for age and sex

Model 2 adjusted for age, sex, wealth, physical activity, smoking, depressive symptoms, chronic illness, medication (lipid lowering, anti-hypertensive, diabetes medication).
