# Supplementary material for: Improving risk estimates for metabolically healthy obesity and mortality using a refined healthy reference group
Source: PubMed Central journal article supplement (PMC5967883; doi:10.1530/eje-17-0217), 2017-05-30
Supplement: eje-177-169-t002.pdf [file eje-177-169-t002.pdf]

## Supplementary analyses

**Table S2.** Change in metabolic health/obesity status over 4 years

| Baseline |      | 4- year follow-up |      |     |     | Total |
|----------|------|-------------------|------|-----|-----|-------|
|          |      | MHNO              | MUNO | MHO | MUO |       |
|          | MHNO | 994               | 406  | 49  | 60  | 1509  |
|          | MUNO | 185               | 499  | 7   | 73  | 764   |
|          | MHO  | 25                | 19   | 107 | 129 | 280   |
|          | MUO  | 16                | 46   | 58  | 417 | 537   |
| Total    |      | 1220              | 970  | 221 | 679 | 3090  |

Healthy non-obese (MHNO) ; unhealthy non-obese (MUNO); Healthy obese (MHO); Unhealthy obese (MUO)
