# Supplementary material for: Improving risk estimates for metabolically healthy obesity and mortality using a refined healthy reference group
Source: PubMed Central journal article supplement (PMC5967883; doi:10.1530/eje-17-0217), 2017-05-30
Supplement: eje-177-169-t003.pdf [file eje-177-169-t003.pdf]

## Supplementary analyses

**Table S3.** Cox proportional hazards regression for associations of obesity, metabolic health and mortality: sensitivity analyses using zero risk factors to define 'metabolically healthy' and referent healthy non-obese group based on 2004-05 only (n=5,427).

| <b>Baseline metabolic health/obesity status</b> | <b>All Deaths / N</b> | <b>Model 1 HR (95% CI)</b> | <b>Model 2 HR (95% CI)</b> |
|-------------------------------------------------|-----------------------|----------------------------|----------------------------|
| Healthy non-obese                               | 90/1155               | 1.00 (ref)                 | 1.00 (ref)                 |
| Unhealthy non-obese                             | 387/2712              | 1.61 (1.28, 2.02)          | 1.49 (1.18, 1.87)          |
| Healthy obese                                   | 14/142                | 1.46 (0.83, 2.57)          | 1.39 (0.79, 2.44)          |
| Unhealthy obese                                 | 156/1348              | 1.73 (1.33, 2.25)          | 1.49 (1.14, 1.95)          |
|                                                 |                       |                            |                            |
|                                                 | <b>CVD deaths/N</b>   |                            |                            |
| Healthy non-obese                               | 15/1155               | 1.00 (ref)                 | 1.00 (ref)                 |
| Unhealthy non-obese                             | 101/2712              | 2.60 (1.51, 4.47)          | 2.42 (1.40, 4.19)          |
| Healthy obese                                   | 4/142                 | 2.70 (0.89, 8.12)          | 2.63 (0.87, 7.98)          |
| Unhealthy obese                                 | 37/1348               | 2.90 (1.58, 5.34)          | 2.46 (1.33, 4.56)          |

Model 1 adjusted for age and sex

Model 2 adjusted for age, sex, wealth, physical activity, smoking, depressive symptoms, chronic illness.
