# Supplementary material for: Improving risk estimates for metabolically healthy obesity and mortality using a refined healthy reference group
Source: PubMed Central journal article supplement (PMC5967883; doi:10.1530/eje-17-0217), 2017-05-30
Supplement: eje-177-169-t004.pdf [file eje-177-169-t004.pdf]

## Supplementary analyses

**Table S4.** Cox proportional hazards regression for associations of obesity, metabolic health and mortality, with referent healthy non-obese group defined by status in 2004-05 only (n=5,427). Categories re-defined using modified criteria (90<sup>th</sup> percentile) for C-reactive protein.

| <b>Baseline metabolic health/obesity status</b> | <b>All Deaths / N</b> | <b>Model 1 HR (95% CI)</b> | <b>Model 2 HR (95% CI)</b> |
|-------------------------------------------------|-----------------------|----------------------------|----------------------------|
| Healthy non-obese                               | 300/2876              | 1.00 (ref)                 | 1.00 (ref)                 |
| Unhealthy non-obese                             | 177/1085              | 1.35 (1.16, 1.64)          | 1.31 (1.07, 1.59)          |
| Healthy obese                                   | 71/728                | 1.18 (0.91, 1.53)          | 1.13 (0.87, 1.47)          |
| Unhealthy obese                                 | 99/794                | 1.44 (1.15, 1.81)          | 1.31 (1.03, 1.67)          |
|                                                 |                       |                            |                            |
|                                                 | <b>CVD deaths/N</b>   |                            |                            |
| Healthy non-obese                               | 73/2876               | 1.00 (ref)                 | 1.00 (ref)                 |
| Unhealthy non-obese                             | 43/1085               | 1.33 (0.91, 1.94)          | 1.40 (0.95, 2.06)          |
| Healthy obese                                   | 14/728                | 1.08 (0.61, 1.92)          | 0.95 (0.47, 1.93)          |
| Unhealthy obese                                 | 27/794                | 1.84 (1.18, 2.88)          | 1.68 (1.09, 2.59)          |

Model 1 adjusted for age and sex

Model 2 adjusted for age, sex, wealth, physical activity, smoking, depressive symptoms, chronic illness, medication (lipid lowering, anti-hypertensive, diabetes medication).
